# Supplementary material
Source: publisher site journal article supplement (https://www.dovepress.com/get_supplementary_file.php?f=374951.docx)
Supplement: Supplementary file 1 [file get_supplementary_file.php]

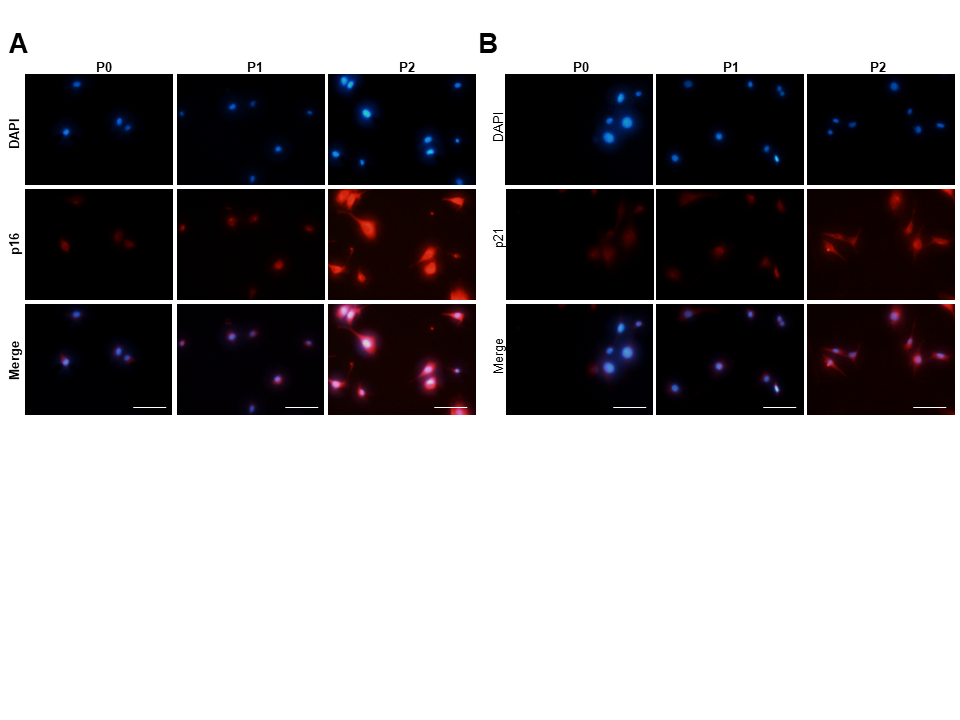


**S-Figure 1. P16 and p21 Expressions in Our RS Model of AFs.** AFs isolated from young mice were passaged and classified as P0, P1 and P2, as described in Figure 3. **A** and **B**; Representative immunofluorescence images of DAPI (*top*), p16 (red; *A*) and p21 (red; *B*) expression (*middle*) and merged (*bottom*) in P0, P1 and P2 cells. bar=100μm.


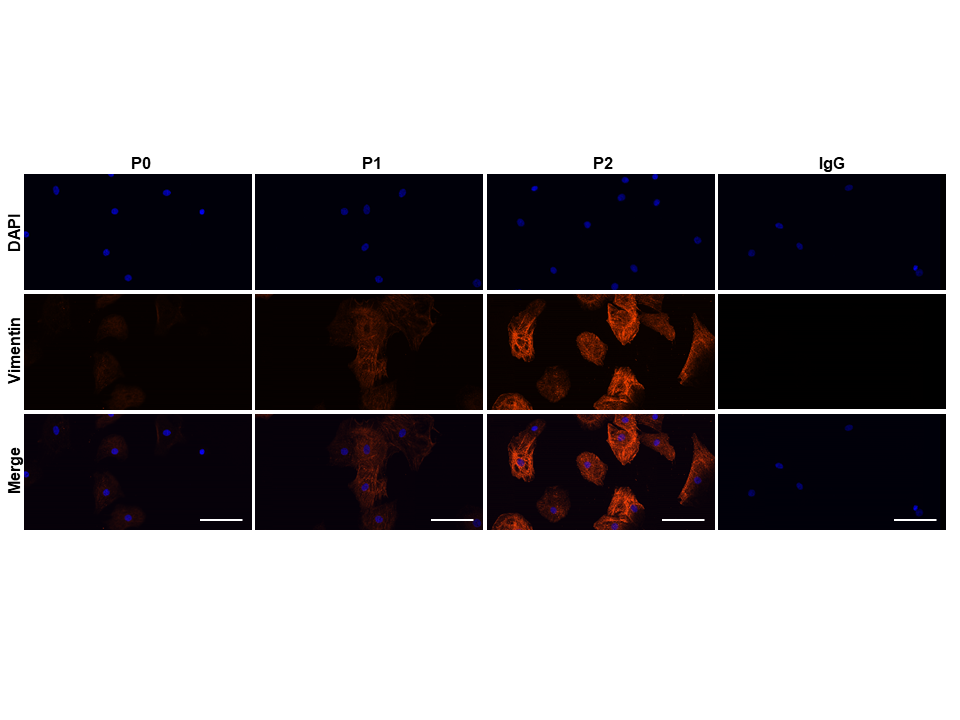


**S-Figure 2. Vimentin Expression in Our RS Model of AFs.** AFs isolated from young mice were passaged and classified as P0, P1 and P2, as described in Figure 3. Figures show immunofluorescence images of DAPI (*top*), vimentin (red; *middle*) and merged (*bottom*) in P0, P1 and P2 cells. bar=50μm. Data are representative of three independent experiments.

**
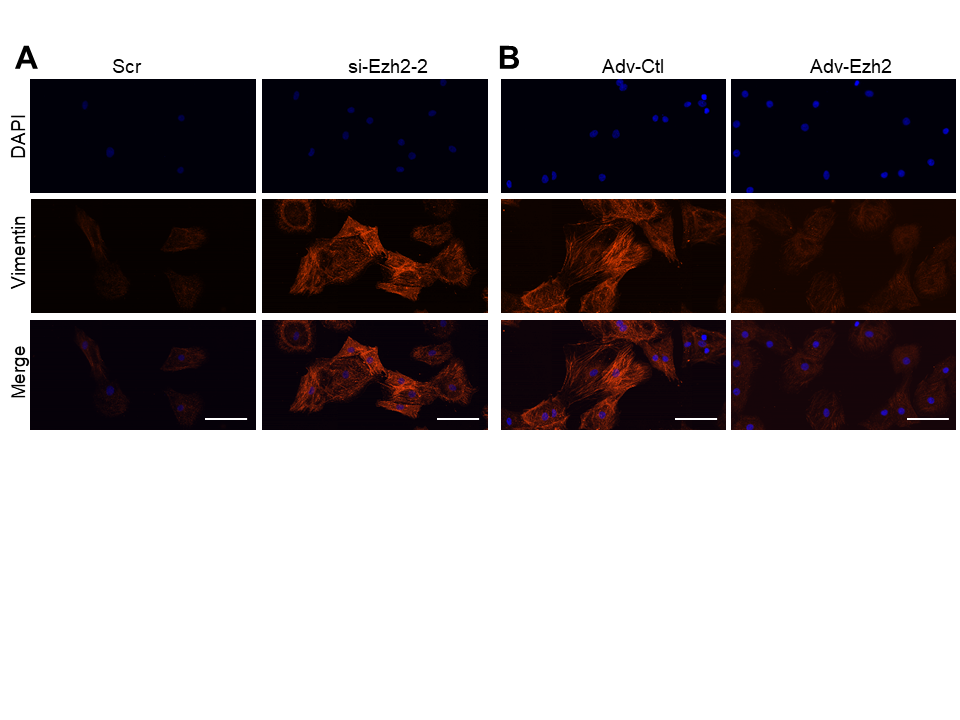
**

**S-Figure 3. Ezh2-associated Changes in Vimentin Expression in Our RS Model of AFs. A**; As described in Figure 4, isolated, plated and stably attached AFs on Day-1 were transfected with scramble (Scr) or Ezh2 siRNAs (100nM) for 72h and harvested on Day-4 of P1 cells for immunofluorescence. Shown are images of DAPI (*top*), vimentin (red; *middle*) and merged (*bottom*). bar=100μm. **B**; As described in Figure 5, AFs on P2 cells were transduced with Adv-Ezh2 and harvested 72h later for immunofluorescence. Illustrated are images of DAPI (*top*), vimentin (red; *middle*) and merged (*bottom*). bar=50μm.


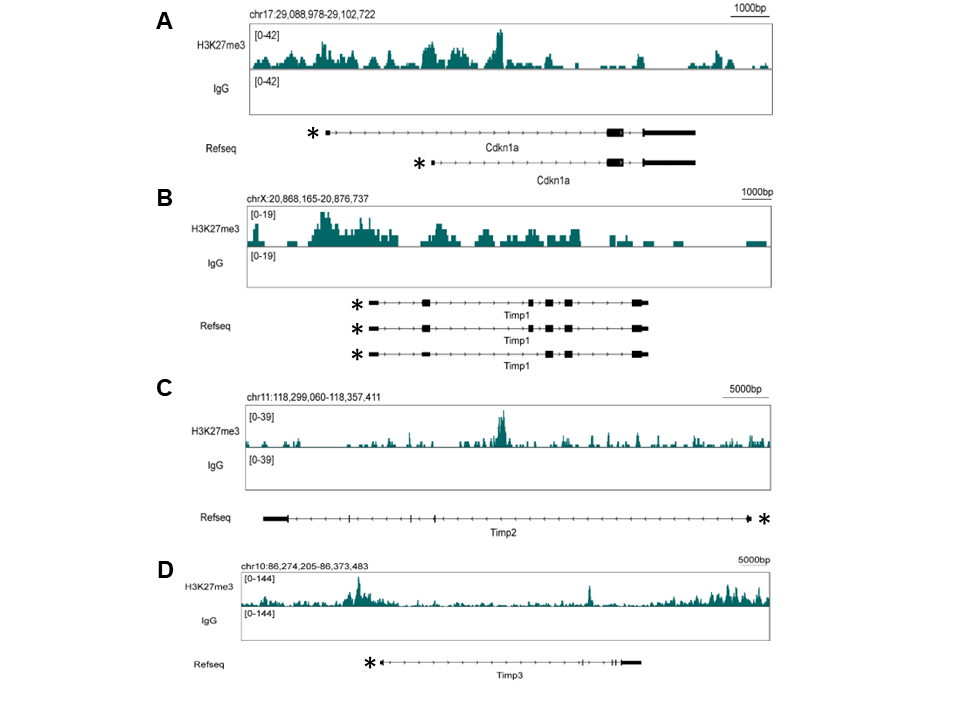


**S-Figure 4. Distribution of H3K27me3 on Cdkn1a (p21cip), Timp1, Timp2 and Timp3 genes. A**~**D**; CUT&Tag tracks show H3K27me3 potential localizations on CDKN1a (p21cip; *A*), Timp1 (*B*), Timp2 (*C*) and Timp3 (*D*) genes.


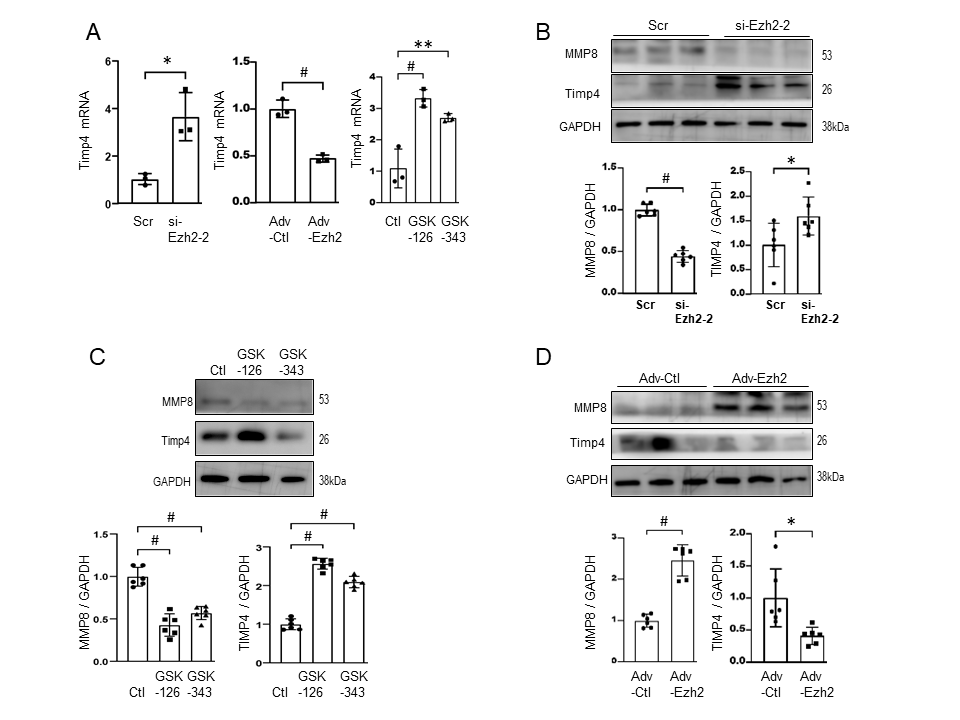


**S-Figure 5. Changes in Timp4 and MMP8 expressions following** **Ezh2’s knockdown, inhibition and overexpression.** AFs in P1 were treated with either Ezh2 siRNA (100nM) or Ezh2 inhibitor GSK-126 (1μM) or GSK-343 (1μM). AFs in P2 were infected with the Adv-Ezh2. After 72h, all cells were harvested for analyses. **A**; Transcriptions of Timp4 gene were evaluated by qRT-PCR (n=3). **B~D**; Expressions of MMP8 and Timp4 were assessed by WB after Ezh2’s knockdown (*B*), inhibition (*C*) and overexpression (*D*). n=6.

Data are presented as mean ± SD. *: *p*<0.05, **: *p*<0.01, #: *p*<0.001.

**S-Table 1. Primers used for qRT-PCR.**

| **Gene** | **Forward Primer** | **Reverse Primer** |
| --- | --- | --- |
| P16 | AACTCTTTCGGTCGTACCCC | GCGTGCTTGAGCTGAAGCTA |
| P19 | CGCAGGTTCTTGGTCACTGT | TGTTCACGAAAGCCAGAGCG |
| P21 | CCTGGTGATGTCCGACCTG | CCATGAGCGCATCGCAATC |
| Timp1 | GCAACTCGGACCTGGTCATAA | CGGCCCGTGATGAGAAACT |
| Timp2 | GCAACCCCATCAAGAGGATTC | GGGGCCGTGTAGATAAACTCG |
| Timp3 | GAAGCCTCTGAAAGTCTTTGTGG | ACATCTTGCCTTCATACACGC |
| Timp4 | CACTCGGCTCTAGTGATACGG | CTTGGCCTTCTCGAACCCTTT |
| IL-1α | GCACCTTACACCTACCAGAGT | AAACTTCTGCCTGACGAGCTT |
| IL-1β | GCAACTGTTCCTGAACTCAACT | ATCTTTTGGGGTCCGTCAACT |
| IL-6 | TAGTCCTTCCTACCCCAATTTCC | TTGGTCCTTAGCCACTCCTTC |
| MCP-1 | TTAAAAACCTGGATCGGAACCAA | GCATTAGCTTCAGATTTACGGGT |

**S-Table 2. Primers used for PCR of P16, P19 and Timp4 gene promoter regions post CUT&Tag.**

| **Gene Promoter** | **Forward Primer** | **Reverse Primer** |
| --- | --- | --- |
| p16 | CCATAGGTGGCGCTATTTGC | TCCGATCCTTTAGCGCTGTT |
| p19 | CGGGATCGCACGAACTTCA | GCTTCTCACCTCGCTTGTCA |
| Timp4 | GGGTCTGCCTGTCGTAACAA | TGCAACTTCCCAACTGGGTT |
